# Supplementary material for: Neuroanatomical dimensions in medication-free individuals with major depressive disorder and treatment response to SSRI antidepressant medications or placebo
Source: Springer Nature journal article supplement (doi:10.1038/s44220-023-00187-w), 2024-01-12
Supplement: MOESM1 [file 44220_2023_187_MOESM1_ESM.pdf]

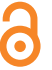

---

# **Neuroanatomical dimensions in medication-free individuals with major depressive disorder and treatment response to SSRI antidepressant medications or placebo**

---

In the format provided by the authors and unedited

## Supplementary materials

Neuroanatomical dimensions in medication-free individuals with major depressive disorder and treatment response to SSRI antidepressant medications or placebo

Cynthia H.Y. Fu, Mathilde Antoniadou, Guray Erus, Jose A. Garcia, Yong Fan, Danilo Arnone, Stephen R. Arnott, Taolin Chen, Ki Sueng Choi, Cherise Chin Fatt, Benicio N. Frey, Vibe G. Frokjaer, Melanie Ganz, Beata R. Godlewska, Stefanie Hassel, Keith Ho, Andrew M. McIntosh, Kun Qin, Susan Rotzinger, Matthew D. Sacchet, Jonathan Savitz, Haochang Shou, Ashish Singh, Aleks Stolicyn, Irina Strigo, Stephen C. Strother, Duygu Tosun, Teresa A. Victor, Dongtao Wei, Toby Wise, Roland Zahn, Ian M. Anderson, W. Edward Craighead, J.F. William Deakin, Boadie W. Dunlop, Rebecca Elliott, Qiyong Gong, Ian H. Gotlib, Catherine Harmer, Sidney H. Kennedy, Gitte M. Knudsen, Helen S. Mayberg, Martin P. Paulus, Jiang Qiu, Madhukar H. Trivedi, Heather C. Whalley, Chao-Gan Yan, Allan H. Young, Christos Davatzikos

## Table of Contents

|                                                                                                                                                   |    |
|---------------------------------------------------------------------------------------------------------------------------------------------------|----|
| <b>Supplementary Method 1. Description of main datasets in this study</b> .....                                                                   | 3  |
| <b>Supplementary Method 2. Estimation of years of education</b> .....                                                                             | 5  |
| <b>Supplementary Results 1. Comparison of estimated prior medication status across HYDRA dimensions</b> .....                                     | 6  |
| <b>Supplementary Results 2. Interaction between HYDRA dimensions and treatment outcomes whilst controlling for medication and education</b> ..... | 7  |
| <b>Supplementary Figure 1</b> .....                                                                                                               | 8  |
| <b>Supplementary Figure 2</b> .....                                                                                                               | 9  |
| <b>Supplementary Figure 3</b> .....                                                                                                               | 10 |
| <b>Supplementary Figure 4</b> .....                                                                                                               | 11 |
| <b>Supplementary Figure 5</b> .....                                                                                                               | 12 |
| <b>Supplementary Table 1. Scanner protocols</b> .....                                                                                             | 13 |
| <b>Supplementary Table 2. Demographic information for healthy control participants by site</b> .....                                              | 14 |
| <b>Supplementary Table 3. Demographic information for MDD participants by site</b> .....                                                          | 15 |
| <b>Supplementary Table 4. List of structural MUSE regions of interest used in the HYDRA model</b> .....                                           | 16 |
| <b>Supplementary Table 5. Regional volumetric differences between patients with first-episode depression and healthy controls.</b> .....          | 23 |
| <b>Supplementary References</b> .....                                                                                                             | 27 |



## Supplementary Method 1. Description of main datasets in this study

Full descriptions of the datasets are available in: Fu CHY, Erus G, Fan Y, Antoniadis M, et al., AI-based dimensional neuroimaging system for characterizing heterogeneity in brain structure and function in major depressive disorder: COORDINATE-MDD consortium design and rationale. *BMC Psychiatry*. Jan 23 2023;23(1):59. doi:10.1186/s12888-022-04509-7.

Main datasets in this study are as follows:

1. Canadian Biomarker Integration Network in Depression (CAN-BIND) is a national depression program with recruitment from 7 centers (MacQueen et al., 2019). Treatment protocol is 8-week trial with SSRI antidepressant (escitalopram) followed by an augmentation trial if there is poor treatment response (i.e., less than 50% improvement in depressive symptoms). MRI scans have been acquired at baseline, weeks 2 and 8 in both MDD and healthy participants.
2. Establishing Moderators and Biosignatures of Antidepressant Response in Clinical Care (EMBARC) is a multisite, randomized, placebo-controlled clinical trial with recruitment from 4 centers (Trivedi et al., 2016). Treatment protocol is an 8-week double-blind randomized allocation to SSRI (escitalopram) or placebo, with double-blind cross over switch to another antidepressant if there is poor treatment response. MRI scans have been acquired in MDD and healthy participants at baseline.
3. Huaxi MR Research Center at Sichuan University (SCU) cohort consists of medication-naïve first episode MDD and matched healthy participants (Qiu et al., 2018; Zhao et al., 2020; Zhao et al., 2021).
4. King's College London cohort consists of 4 studies (Green et al., 2012; Nouretdinov et al., 2011; Sankar et al., 2016; Wise et al., 2017, 2018). MRI scans have been acquired in MDD and healthy participants, and the treatment study is an 8-week selective serotonin and norepinephrine reuptake inhibitor (SNRI) antidepressant (duloxetine) with MRI scans at baseline, weeks 2 and 8 in both MDD and healthy participants.
5. Laureate Institute for Brain Research (LIBR) cohort consists of MRI data in first episode and recurrent MDD and matched healthy controls from 2 studies (Ford et al., 2019; Misaki et al., 2016; Zheng et al., 2021).
6. Manchester cohort consists of 3 studies (Arnone et al., 2012, 2013; Dutta et al., 2019). All participants have a baseline MRI scan, and the treatment study is 8-week SSRI (citalopram) with MRI scans at baseline and week 8 (Arnone et al., 2012).
7. Oxford cohort consists of 6-week SSRI (escitalopram) treatment with MRI scans at baseline and week 6 (Godlewska et al., 2014, 2018).
8. Predictors of Remission in Depression to Individual and Combined Treatments (PREdict) study is a 12-week randomized clinical trial of treatment-naïve MDD participants with 3 treatment arms: SSRI (escitalopram), SNRI (duloxetine), or CBT, with an augmentation trial if there is no remission. MRI scans were acquired at baseline (Dunlop et al., 2012).
9. Southwest University (SWU) cohort consists of a community-based recruitment which includes first episode and recurrent MDD and healthy control participant (Liu et al., 2017, 2021; Hu et al., 2021).

10. Stanford (SNAP) cohort consists of first episode and recurrent MDD and healthy participants (Sacchet & Gotlib, 2017; Sacchet et al., 2019).
11. Stratifying Resilience and Depression Longitudinally (STRADL) is a community-based cohort from the Generation Scotland Scottish Family Health Study with detailed clinical, cognitive and neuroimaging assessments (Habota et al., 2019). Single session MRI scans were acquired.

All patients are adults with a primary diagnosis of MDD that is first episode or recurrent, in a current episode of a moderate to severe severity, that is non-psychotic. MDD diagnosis was based on DSM-IV (SCU, Manchester, Oxford) or DSM-IV-TR (CAN-BIND, EMBARC, KCL, LIBR, Stanford SNAP, STRADL) using the Structured Clinical Interview for DSM (SCID) (EMBARC, SCU, KCL, Manchester, Oxford, Stanford SNAP, STRADL) or Mini International Neuropsychiatric Interview (MINI) (CAN-BIND, KCL).

Depressive severity was measured with standardized clinician-rated scales: 17-item Hamilton Rating Scale for Depression (HRSD, (Hamilton, 1960) (EMBARC, SCU, KCL, Oxford, PREDICT, Stanford SNAP), Montgomery-Åsberg Depression Rating Scale (MADRS) (Montgomery & Asberg, 1979)(CAN-BIND, LIBR, Manchester), or Quick Inventory of Depressive Symptomatology (QIDS) (Rush et al., 2003; Trivedi et al., 2004)(STRADL). The rating scales show high correlation in summed scores and percentage score improvements (Leucht et al., 2018; Rush et al., 2003; Uher et al., 2008).

## Supplementary Method 2. Estimation of years of education

Wherever raw text was provided, it was converted into years of education. Unless indicated we assumed that the degree was completed and allocated the maximum number of years associated with completing the degree or diploma. The calculation assumed that participants started school at the age of 5.

| <b>Raw text</b>                                             | <b>Years of education attributed</b> |
|-------------------------------------------------------------|--------------------------------------|
| No education                                                | 0                                    |
| Primary school                                              | 6                                    |
| Middle school                                               | 8                                    |
| Some high school (10th, 11th)                               | 11                                   |
| High school                                                 | 12                                   |
| GED or alternative credential                               | 12                                   |
| 12th grade, no diploma                                      | 12                                   |
| Some college credit, but less than 1 year of college credit | 12.5                                 |
| 1 or more years of college credit, no degree                | 13                                   |
| Some college, no degree                                     | 13                                   |
| Some college                                                | 14                                   |
| Tech school                                                 | 14                                   |
| Associate's degree (for example: AA, AS)                    | 14                                   |
| Trade school                                                | 14                                   |
| College and above                                           | 16                                   |
| Four-year college                                           | 16                                   |
| Junior College                                              | 16                                   |
| Bachelor's degree                                           | 16                                   |
| Some graduate school                                        | 17                                   |
| Grad or Prof Degree                                         | 18                                   |
| Master's degree                                             | 18                                   |
| Doctorate                                                   | 23                                   |

### **Supplementary Results 1. Comparison of estimated prior medication status across HYDRA dimensions**

In order to compare medication exposure across HYDRA dimensions we used a Chi-squared test to determine if the dimensions differed in the number of MDD participants with first episode or recurrent depression. In Dimension 1, 201 participants had recurrent MDD and 89 participants had first episode MDD. In D2, 222 patients had recurrent MDD and 173 had first episode MDD. The Chi-squared test showed a significant difference between the dimensions ( $\chi^2=11.6$ ,  $p=0.0007$ ).

## **Supplementary Results 2. Interaction between HYDRA dimensions and treatment outcomes whilst controlling for medication and education**

The interaction between HYDRA dimension and treatment group was examined using a linear regression model with the percentage change in the clinician-rated depressive symptom scale (continuous) as the outcome variable and HYDRA dimension (categorical, 2 groups) and treatment group (categorical, 2 groups: SSRI and placebo) as the independent variables whilst controlling for age, sex, site, years of education (as a proxy for IQ) and medication status (using first-episode or recurrent MDD as a proxy measure).

Treatment with SSRI medications was associated with a significantly greater improvement in depressive symptoms across both D1 and D2 ( $\beta=34.5$ , 95% CI (7.2 to 61.7),  $p=0.01$ ).

The Dimension by treatment interaction remained significant after controlling for age, sex, site, medication status and years of education ( $\beta=-19.1$ , 95% CI (-36.4 to -1.8),  $p=0.03$ ).

In order to examine whether the interaction between Dimensions and treatment group differed according to SSRI medication, we performed a second linear regression with the treatment group variable including all four treatment categories (SSRI sertraline, SSRI escitalopram, SSRI citalopram and placebo) instead of a binary category (SSRI medications and placebo). The covariates of this linear model included age, sex, site, medication status and years of education. There was a significant interaction between treatment with sertraline and HYDRA dimension ( $\beta=-24.1$ , 95% CI (-43.8 to -4.4),  $p=0.02$ ). The interaction was not significant for escitalopram ( $\beta=-12.1$ , 95% CI (-33.8 to 9.6),  $p=0.27$ ) or citalopram ( $\beta=5.9 \times 10^{-15}$ , 95% CI (- $1.3 \times 10^{-15}$  to  $1.3 \times 10^{-14}$ ),  $p=0.11$ ).



**Supplementary Figure 1**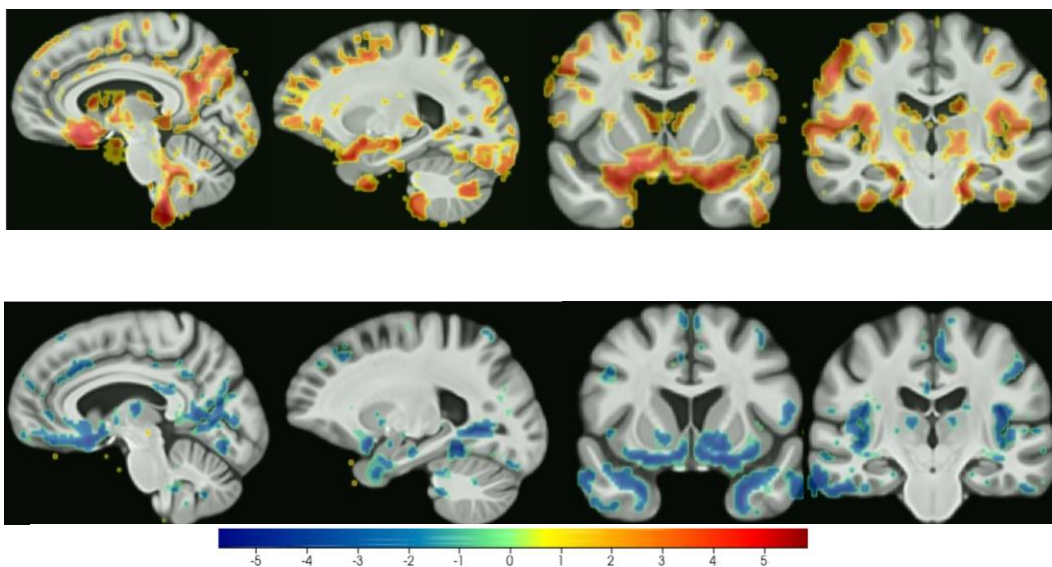

Additional coronal and sagittal views for dimensions 1 and 2 (top and bottom rows respectively), indicating areas with significant differences from controls. Colour represents direction and strength of group differences as indicated by the colour bar.

**Supplementary Figure 2**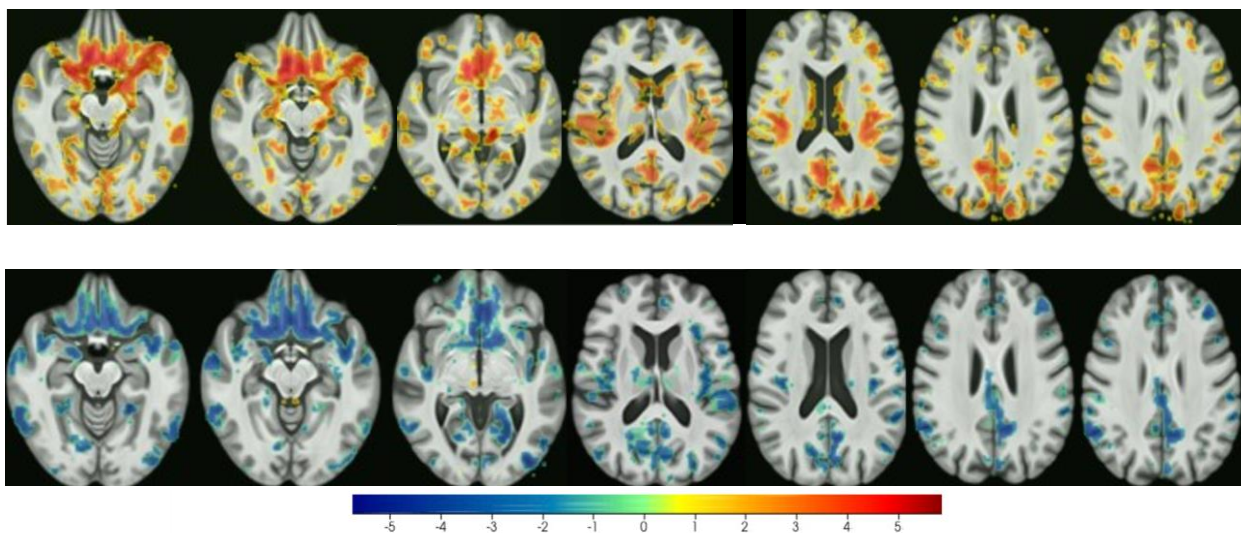

Additional transverse views for dimensions 1 and 2 (top and bottom rows respectively), indicating areas with significant differences from controls. Colour represents direction and strength of group differences as indicated by the colour bar.

**Supplementary Figure 3**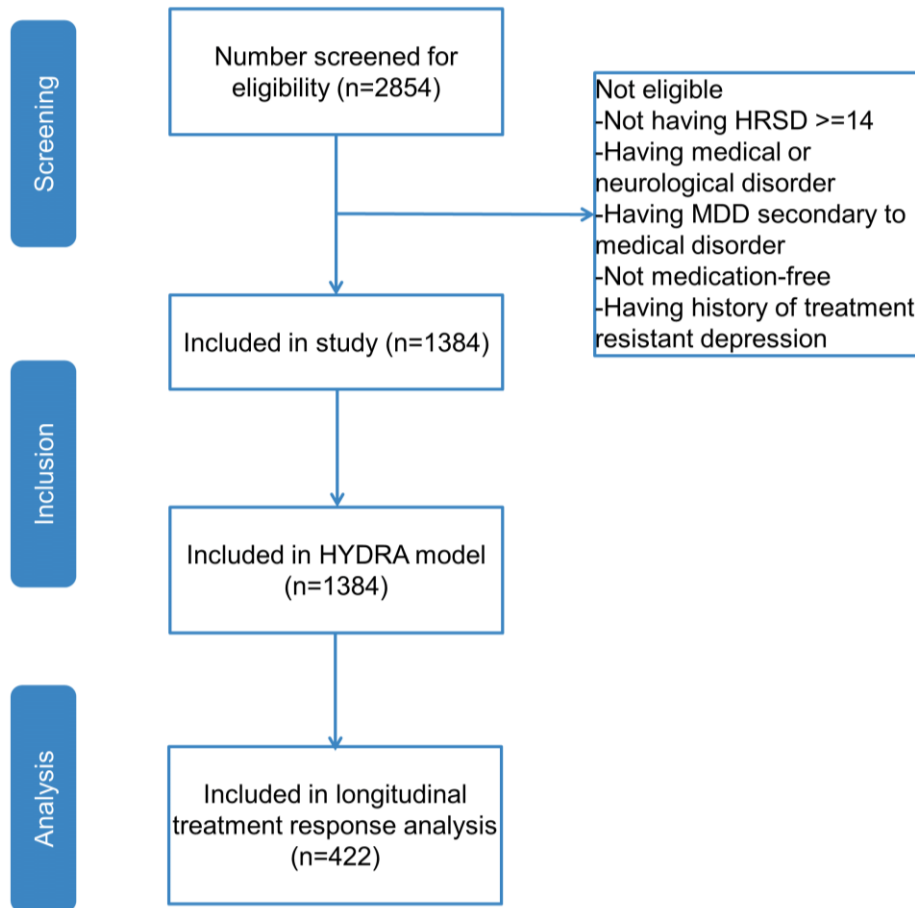

**Supplementary Figure 3.** Flow diagram of the screening process to include subjects in the final analyses.

**Supplementary Figure 4**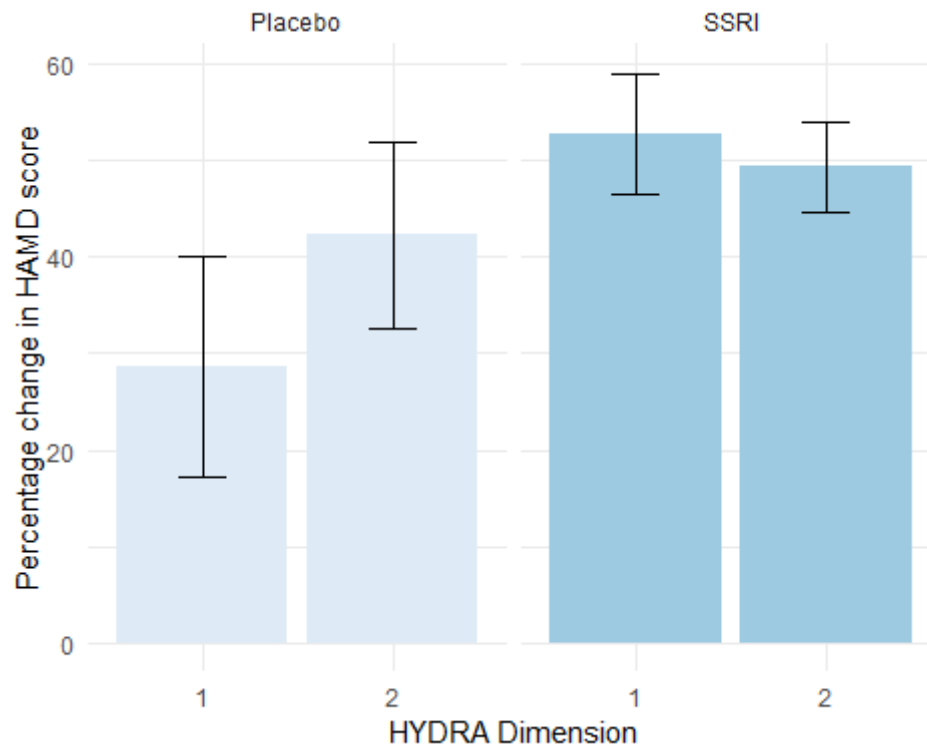

**Supplementary Figure 4.** Difference in percentage change in HAM-D scores across HYDRA Dimensions (D1 (n=169) and D2 (n=253), n=422) and binary treatment groups following treatment with SSRI medications (n=313) and placebo (n=109). The sample consists of all five cohorts including PR*EDICT*. Data are presented using a bar plot as mean values and 95<sup>th</sup> percentile error bars. The asterisks (\*) indicate significant differences between the two subgroups using linear regression model (two-sided  $P < 0.05$ ).

### Supplementary Figure 5

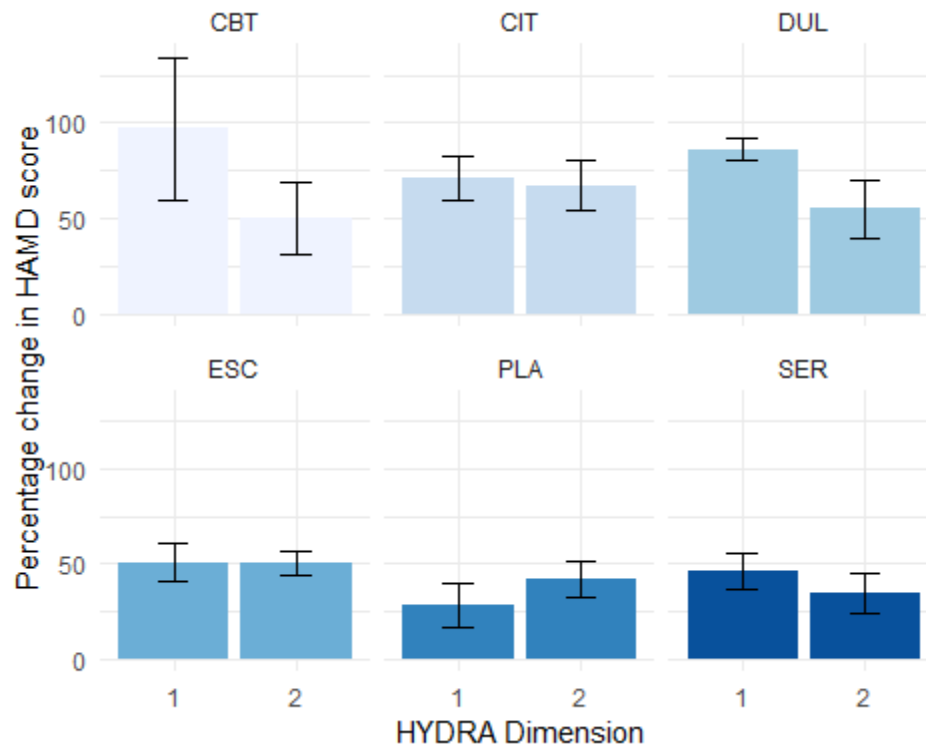

**Supplementary Figure 5.** Difference in percentage change in HAMD scores across HYDRA Dimensions (D1 (n=164) and D2 (n=195), n=359) and 6 different treatment groups following treatment with cognitive behavioral therapy (CBT, N=19), placebo medication (PLA, N=109), citalopram medication (CIT, n=36), duloxetine medication (DUL, N=20), escitalopram medication (ESC, N=140), sertraline medication (SER, n=98). The sample consists of all five cohorts including PRoDICT. Data are presented using a bar plot as mean values and 95<sup>th</sup> percentile error bars. The asterisks (\*) indicate significant differences between the two subgroups using linear regression model (two-sided  $P < 0.05$ ).

**Supplementary Table 1.** Scanner protocols

|                                       | <b>CAN-BIND</b>  | <b>EMBARC</b>                                          | <b>HMRRC</b>    | <b>Manchester</b>   | <b>LIBR</b>           | <b>Oxford</b>       | <b>PReDICT</b>               | <b>Stanford</b>      | <b>STRADL</b>                                |
|---------------------------------------|------------------|--------------------------------------------------------|-----------------|---------------------|-----------------------|---------------------|------------------------------|----------------------|----------------------------------------------|
| <b>Scanner model</b>                  | GE 3T Signa HDxt | All 3T: GE Signa HDx; Siemens TrioTim, Philips Ingenia | 3T Siemens Trio | Philips Intera 1.5T | GE 3T Discovery MR750 | 3T Siemens TIM Trio | 3T Siemens Magnetom TIM Trio | 1.5T GE Signa Excite | 3T Philips Achieva TX; Siemens 3T Prisma fit |
| <b>T1 Resolution (mm<sup>3</sup>)</b> | 1x1x1            | 1x1x1                                                  | 0.94x0.94x1     | 0.875x0.875x1       | 0.9375x0.9375x0.9     | 1x1x1               | 1x1x1                        | 0.86x0.86            | 1x1x1                                        |
| <b>TR/TE (ms)</b>                     | 7.5/2.86         | 5.9-8.2/2.4-3.7                                        | 1900/2.26       | 8.99/4.2            | 5.0/2.0               | 20040/4.68          | 2300/2-4                     | 8.3-10.1/1.7-3.0     | 8.2/3.8                                      |
| <b>Number of volumes</b>              | 176              | 160                                                    | 176             | 160                 | 120                   |                     |                              | 116                  | 160                                          |

**Supplementary Table 2.** Demographic information for healthy control participants by site

| Site              | Sample size | Age (mean) | F/M (n) | Years of education (mean) | HAMD | MADRS | QIDS |
|-------------------|-------------|------------|---------|---------------------------|------|-------|------|
| <b>CAN-BIND</b>   | 23          | 33.3       | 12/11   | 15.1                      |      | 0.6   |      |
| <b>EMBARC</b>     | 39          | 37.1       | 24/15   | 15.1                      | 0.6  |       |      |
| <b>HMRRRC</b>     | 139         | 30.9       | 71/68   | 12.9                      | NA   |       |      |
| <b>KCL-Blame</b>  | 46          | 33.4       | 29/17   | 17.3                      |      | 0.7   |      |
| <b>KCL-BUD</b>    | 20          | 30.1       | 18/2    | 17.5                      |      | 1.0   |      |
| <b>LIBR-B</b>     | 81          | 30.5       | 44/37   | 15.0                      | 1.9  |       |      |
| <b>LIBR-S</b>     | 60          | 32.0       | 39/21   | 14.6                      | 1.8  |       |      |
| <b>Manchester</b> | 30          | 33.3       | 21/9    | NA                        |      | 0.1   |      |
| <b>Oxford</b>     | 31          | 30.3       | 18/13   | NA                        | 0.4  |       |      |
| <b>PReDICT</b>    | 0           | NA         | NA      | NA                        |      |       |      |
| <b>Stanford</b>   | 50          | 32.6       | 33/17   | 16.0                      | 2.0  |       |      |
| <b>STRADL</b>     | 180         | 56.8       | 95/85   | 16.0                      |      |       | 2.7  |
| <b>Total</b>      | 699         | 38.4       | 404/295 | 15.3                      | 1.5  | 0.6   | 2.7  |

Age was not part of our inclusion/exclusion criteria so it was just happenstance that the groups have different age ranges. The number of controls by age above 65 is as follows:

|           |     |
|-----------|-----|
| <b>65</b> | N=6 |
| <b>66</b> | N=4 |
| <b>67</b> | N=2 |
| <b>68</b> | N=4 |
| <b>69</b> | N=1 |
| <b>70</b> | N=2 |
| <b>71</b> | N=4 |
| <b>72</b> | N=1 |

**Supplementary Table 3.** Demographic information for MDD participants by site

| Site              | Sample size | Dimension 1/2 | Age (mean) | F/M (n) | FE/RC   | Years of education (mean) | Age of onset (mean, sd) | HAMD | MADRS | QIDS |
|-------------------|-------------|---------------|------------|---------|---------|---------------------------|-------------------------|------|-------|------|
| <b>CAN-BIND</b>   | 92          | 27/65         | 36.0       | 61/31   | 14/49   | 13.9                      | 22.0 (10.9)             |      | 29.7  |      |
| <b>EMBARC</b>     | 257         | 134/123       | 36.6       | 166/91  | 1/253   | 15.1                      |                         | 19.5 |       |      |
| <b>HMRRC</b>      | 111         | 53/58         | 31.7       | 65/46   | 81/0    | 13.2                      |                         | 25.2 |       |      |
| <b>KCL-BUD</b>    | 20          | 10/10         | 29.6       | 18/2    |         | 15.1                      | 22.8 (7.8)              |      | 27.3  |      |
| <b>LIBR-B</b>     | 32          | 14/18         | 35.3       | 21/11   |         | 14.0                      |                         | 18.5 |       |      |
| <b>LIBR-S</b>     | 22          | 12/10         | 35.2       | 15/7    |         | 14.0                      |                         | 19.6 |       |      |
| <b>Manchester</b> | 40          | 19/21         | 36.4       | 27/13   | 3/37    |                           | 22.0 (8.1)              |      | 27.3  |      |
| <b>Oxford</b>     | 39          | 14/25         | 29.9       | 24/15   | 25/14   |                           | 25.4 (9.1)              | 22.7 |       |      |
| <b>PRedICT</b>    | 63          | 5/58          | 39.3       | 36/27   |         | 15.0                      | 29.7 (12.2)             | 18.3 |       |      |
| <b>Stanford</b>   | 8           | 2/6           | 34.0       | 5/3     | 4/2     | 15.0                      |                         | 17.5 |       |      |
| <b>STRADL</b>     | 1           | 0/1           | 59.0       | 1/0     |         | 16.0                      |                         |      |       | 16   |
| <b>Total</b>      | 685         | 290/395       | 35.3       | 439/246 | 128/355 | 14.5                      | 24.5 (10.8)             | 21.2 | 29.0  | 16   |



**Supplementary Table 4.** List of structural MUSE regions of interest used in the HYDRA model

| ROI index | ROI Name                          | ROI Resolution |
|-----------|-----------------------------------|----------------|
| 4         | 3rd Ventricle                     | Single         |
| 11        | 4th Ventricle                     | Single         |
| 23        | Right Accumbens Area              | Single         |
| 30        | Left Accumbens Area               | Single         |
| 31        | Right Amygdala                    | Single         |
| 32        | Left Amygdala                     | Single         |
| 35        | Brain Stem                        | Single         |
| 36        | Right Caudate                     | Single         |
| 37        | Left Caudate                      | Single         |
| 38        | Right Cerebellum Exterior         | Single         |
| 39        | Left Cerebellum Exterior          | Single         |
| 40        | Right Cerebellum White Matter     | Single         |
| 41        | Left Cerebellum White Matter      | Single         |
| 47        | Right Hippocampus                 | Single         |
| 48        | Left Hippocampus                  | Single         |
| 49        | Right Inferior Lateral Ventricle  | Single         |
| 50        | Left Inferior Lateral Ventricle   | Single         |
| 51        | Right Lateral Ventricle           | Single         |
| 52        | Left Lateral Ventricle            | Single         |
| 55        | Right Pallidum                    | Single         |
| 56        | Left Pallidum                     | Single         |
| 57        | Right Putamen                     | Single         |
| 58        | Left Putamen                      | Single         |
| 59        | Right Thalamus Proper             | Single         |
| 60        | Left Thalamus Proper              | Single         |
| 61        | Right Ventral DC                  | Single         |
| 62        | Left Ventral DC                   | Single         |
| 71        | Cerebellar Vermal Lobules I-V     | Single         |
| 72        | Cerebellar Vermal Lobules VI-VII  | Single         |
| 73        | Cerebellar Vermal Lobules VIII-X  | Single         |
| 75        | Left Basal Forebrain              | Single         |
| 76        | Right Basal Forebrain             | Single         |
| 81        | Frontal lobe white matter right   | Single         |
| 82        | Frontal lobe white matter left    | Single         |
| 83        | Occipital lobe white matter right | Single         |
| 84        | Occipital lobe white matter left  | Single         |
| 85        | Parietal lobe white matter right  | Single         |
| 86        | Parietal lobe white matter left   | Single         |
| 87        | Temporal lobe white matter right  | Single         |

|            |                                                                 |        |
|------------|-----------------------------------------------------------------|--------|
| <b>88</b>  | Temporal lobe white matter left                                 | Single |
| <b>89</b>  | Right fornix                                                    | Single |
| <b>90</b>  | Left fornix                                                     | Single |
| <b>91</b>  | Anterior limb of internal capsule right                         | Single |
| <b>92</b>  | Anterior limb of internal capsule left                          | Single |
| <b>93</b>  | Posterior limb of internal capsule inc. cerebral peduncle right | Single |
| <b>94</b>  | Posterior limb of internal capsule inc. cerebral peduncle left  | Single |
| <b>95</b>  | Corpus callosum                                                 | Single |
| <b>100</b> | Right anterior cingulate gyrus                                  | Single |
| <b>101</b> | Left anterior cingulate gyrus                                   | Single |
| <b>102</b> | Right anterior insula                                           | Single |
| <b>103</b> | Left anterior insula                                            | Single |
| <b>104</b> | Right anterior orbital gyrus                                    | Single |
| <b>105</b> | Left anterior orbital gyrus                                     | Single |
| <b>106</b> | Right angular gyrus                                             | Single |
| <b>107</b> | Left angular gyrus                                              | Single |
| <b>108</b> | Right calcarine cortex                                          | Single |
| <b>109</b> | Left calcarine cortex                                           | Single |
| <b>112</b> | Right central operculum                                         | Single |
| <b>113</b> | Left central operculum                                          | Single |
| <b>114</b> | Right cuneus                                                    | Single |
| <b>115</b> | Left cuneus                                                     | Single |
| <b>116</b> | Right entorhinal area                                           | Single |
| <b>117</b> | Left entorhinal area                                            | Single |
| <b>118</b> | Right frontal operculum                                         | Single |
| <b>119</b> | Left frontal operculum                                          | Single |
| <b>120</b> | Right frontal pole                                              | Single |
| <b>121</b> | Left frontal pole                                               | Single |
| <b>122</b> | Right fusiform gyrus                                            | Single |
| <b>123</b> | Left fusiform gyrus                                             | Single |
| <b>124</b> | Right gyrus rectus                                              | Single |
| <b>125</b> | Left gyrus rectus                                               | Single |
| <b>128</b> | Right inferior occipital gyrus                                  | Single |
| <b>129</b> | Left inferior occipital gyrus                                   | Single |
| <b>132</b> | Right inferior temporal gyrus                                   | Single |
| <b>133</b> | Left inferior temporal gyrus                                    | Single |
| <b>134</b> | Right lingual gyrus                                             | Single |
| <b>135</b> | Left lingual gyrus                                              | Single |
| <b>136</b> | Right lateral orbital gyrus                                     | Single |
| <b>137</b> | Left lateral orbital gyrus                                      | Single |
| <b>138</b> | Right middle cingulate gyrus                                    | Single |
| <b>139</b> | Left middle cingulate gyrus                                     | Single |
| <b>140</b> | Right medial frontal cortex                                     | Single |

|     |                                                    |        |
|-----|----------------------------------------------------|--------|
| 141 | Left medial frontal cortex                         | Single |
| 142 | Right middle frontal gyrus                         | Single |
| 143 | Left middle frontal gyrus                          | Single |
| 144 | Right middle occipital gyrus                       | Single |
| 145 | Left middle occipital gyrus                        | Single |
| 146 | Right medial orbital gyrus                         | Single |
| 147 | Left medial orbital gyrus                          | Single |
| 148 | Right postcentral gyrus medial segment             | Single |
| 149 | Left postcentral gyrus medial segment              | Single |
| 150 | Right precentral gyrus medial segment              | Single |
| 151 | Left precentral gyrus medial segment               | Single |
| 152 | Right superior frontal gyrus medial segment        | Single |
| 153 | Left superior frontal gyrus medial segment         | Single |
| 154 | Right middle temporal gyrus                        | Single |
| 155 | Left middle temporal gyrus                         | Single |
| 156 | Right occipital pole                               | Single |
| 157 | Left occipital pole                                | Single |
| 160 | Right occipital fusiform gyrus                     | Single |
| 161 | Left occipital fusiform gyrus                      | Single |
| 162 | Right opercular part of the inferior frontal gyrus | Single |
| 163 | Left opercular part of the inferior frontal gyrus  | Single |
| 164 | Right orbital part of the inferior frontal gyrus   | Single |
| 165 | Left orbital part of the inferior frontal gyrus    | Single |
| 166 | Right posterior cingulate gyrus                    | Single |
| 167 | Left posterior cingulate gyrus                     | Single |
| 168 | Right precuneus                                    | Single |
| 169 | Left precuneus                                     | Single |
| 170 | Right parahippocampal gyrus                        | Single |
| 171 | Left parahippocampal gyrus                         | Single |
| 172 | Right posterior insula                             | Single |
| 173 | Left posterior insula                              | Single |
| 174 | Right parietal operculum                           | Single |
| 175 | Left parietal operculum                            | Single |
| 176 | Right postcentral gyrus                            | Single |
| 177 | Left postcentral gyrus                             | Single |
| 178 | Right posterior orbital gyrus                      | Single |
| 179 | Left posterior orbital gyrus                       | Single |
| 180 | Right planum polare                                | Single |
| 181 | Left planum polare                                 | Single |
| 182 | Right precentral gyrus                             | Single |
| 183 | Left precentral gyrus                              | Single |
| 184 | Right planum temporale                             | Single |
| 185 | Left planum temporale                              | Single |

|            |                                                     |           |
|------------|-----------------------------------------------------|-----------|
| <b>186</b> | Right subcallosal area                              | Single    |
| <b>187</b> | Left subcallosal area                               | Single    |
| <b>190</b> | Right superior frontal gyrus                        | Single    |
| <b>191</b> | Left superior frontal gyrus                         | Single    |
| <b>192</b> | Right supplementary motor cortex                    | Single    |
| <b>193</b> | Left supplementary motor cortex                     | Single    |
| <b>194</b> | Right supramarginal gyrus                           | Single    |
| <b>195</b> | Left supramarginal gyrus                            | Single    |
| <b>196</b> | Right superior occipital gyrus                      | Single    |
| <b>197</b> | Left superior occipital gyrus                       | Single    |
| <b>198</b> | Right superior parietal lobule                      | Single    |
| <b>199</b> | Left superior parietal lobule                       | Single    |
| <b>200</b> | Right superior temporal gyrus                       | Single    |
| <b>201</b> | Left superior temporal gyrus                        | Single    |
| <b>202</b> | Right temporal pole                                 | Single    |
| <b>203</b> | Left temporal pole                                  | Single    |
| <b>204</b> | Right triangular part of the inferior frontal gyrus | Single    |
| <b>205</b> | Left triangular part of the inferior frontal gyrus  | Single    |
| <b>206</b> | Right transverse temporal gyrus                     | Single    |
| <b>207</b> | Left transverse temporal gyrus                      | Single    |
| <b>301</b> | FRONTAL_INFERIOR_GM                                 | Composite |
| <b>302</b> | FRONTAL_INSULAR_GM                                  | Composite |
| <b>303</b> | FRONTAL_LATERAL_GM                                  | Composite |
| <b>304</b> | FRONTAL_MEDIAL_GM                                   | Composite |
| <b>305</b> | FRONTAL_OPERCULAR_GM                                | Composite |
| <b>306</b> | LIMBIC_CINGULATE_GM                                 | Composite |
| <b>307</b> | LIMBIC_MEDIALTEMPORAL_GM                            | Composite |
| <b>308</b> | OCCIPITAL_INFERIOR_GM                               | Composite |
| <b>309</b> | OCCIPITAL_LATERAL_GM                                | Composite |
| <b>310</b> | OCCIPITAL_MEDIAL_GM                                 | Composite |
| <b>311</b> | PARIETAL_LATERAL_GM                                 | Composite |
| <b>312</b> | PARIETAL_MEDIAL_GM                                  | Composite |
| <b>313</b> | TEMPORAL_INFERIOR_GM                                | Composite |
| <b>314</b> | TEMPORAL_LATERAL_GM                                 | Composite |
| <b>315</b> | TEMPORAL_SUPRATEMPORAL_GM                           | Composite |
| <b>316</b> | FRONTAL_INFERIOR_GM_L                               | Composite |
| <b>317</b> | FRONTAL_INSULAR_GM_L                                | Composite |
| <b>318</b> | FRONTAL_LATERAL_GM_L                                | Composite |
| <b>319</b> | FRONTAL_MEDIAL_GM_L                                 | Composite |
| <b>320</b> | FRONTAL_OPERCULAR_GM_L                              | Composite |
| <b>321</b> | LIMBIC_CINGULATE_GM_L                               | Composite |
| <b>322</b> | LIMBIC_MEDIALTEMPORAL_GM_L                          | Composite |
| <b>323</b> | OCCIPITAL_INFERIOR_GM_L                             | Composite |

|     |                             |           |
|-----|-----------------------------|-----------|
| 324 | OCCIPITAL_LATERAL_GM_L      | Composite |
| 325 | OCCIPITAL_MEDIAL_GM_L       | Composite |
| 326 | PARIETAL_LATERAL_GM_L       | Composite |
| 327 | PARIETAL_MEDIAL_GM_L        | Composite |
| 328 | TEMPORAL_INFERIOR_GM_L      | Composite |
| 329 | TEMPORAL_LATERAL_GM_L       | Composite |
| 330 | TEMPORAL_SUPRATEMPORAL_GM_L | Composite |
| 331 | FRONTAL_INFERIOR_GM_R       | Composite |
| 332 | FRONTAL_INSULAR_GM_R        | Composite |
| 333 | FRONTAL_LATERAL_GM_R        | Composite |
| 334 | FRONTAL_MEDIAL_GM_R         | Composite |
| 335 | FRONTAL_OPERCULAR_GM_R      | Composite |
| 336 | LIMBIC_CINGULATE_GM_R       | Composite |
| 337 | LIMBIC_MEDIALTEMPORAL_GM_R  | Composite |
| 338 | OCCIPITAL_INFERIOR_GM_R     | Composite |
| 339 | OCCIPITAL_LATERAL_GM_R      | Composite |
| 340 | OCCIPITAL_MEDIAL_GM_R       | Composite |
| 341 | PARIETAL_LATERAL_GM_R       | Composite |
| 342 | PARIETAL_MEDIAL_GM_R        | Composite |
| 343 | TEMPORAL_INFERIOR_GM_R      | Composite |
| 344 | TEMPORAL_LATERAL_GM_R       | Composite |
| 345 | TEMPORAL_SUPRATEMPORAL_GM_R | Composite |
| 401 | BASAL_GANGLIA               | Composite |
| 402 | DEEP_GM                     | Composite |
| 403 | DEEP_WM                     | Composite |
| 404 | FRONTAL_GM                  | Composite |
| 405 | FRONTAL_WM                  | Composite |
| 406 | LIMBIC_GM                   | Composite |
| 407 | OCCIPITAL_GM                | Composite |
| 408 | OCCIPITAL_WM                | Composite |
| 409 | PARIETAL_GM                 | Composite |
| 410 | PARIETAL_WM                 | Composite |
| 411 | TEMPORAL_GM                 | Composite |
| 412 | TEMPORAL_WM                 | Composite |
| 413 | BASAL_GANGLIA_L             | Composite |
| 414 | DEEP_GM_L                   | Composite |
| 415 | DEEP_WM_L                   | Composite |
| 416 | FRONTAL_GM_L                | Composite |
| 417 | FRONTAL_WM_L                | Composite |
| 418 | LIMBIC_GM_L                 | Composite |
| 419 | OCCIPITAL_GM_L              | Composite |
| 420 | OCCIPITAL_WM_L              | Composite |
| 421 | PARIETAL_GM_L               | Composite |

|     |                 |           |
|-----|-----------------|-----------|
| 422 | PARIETAL_WM_L   | Composite |
| 423 | TEMPORAL_GM_L   | Composite |
| 424 | TEMPORAL_WM_L   | Composite |
| 425 | BASAL_GANGLIA_R | Composite |
| 426 | DEEP_GM_R       | Composite |
| 427 | DEEP_WM_R       | Composite |
| 428 | FRONTAL_GM_R    | Composite |
| 429 | FRONTAL_WM_R    | Composite |
| 430 | LIMBIC_GM_R     | Composite |
| 431 | OCCIPITAL_GM_R  | Composite |
| 432 | OCCIPITAL_WM_R  | Composite |
| 433 | PARIETAL_GM_R   | Composite |
| 434 | PARIETAL_WM_R   | Composite |
| 435 | TEMPORAL_GM_R   | Composite |
| 436 | TEMPORAL_WM_R   | Composite |
| 501 | CORPUS_CALLOSUM | Composite |
| 502 | CEREBELLUM      | Composite |
| 503 | DEEP_WM_GM      | Composite |
| 504 | FRONTAL         | Composite |
| 505 | LIMBIC          | Composite |
| 506 | OCCIPITAL       | Composite |
| 507 | PARIETAL        | Composite |
| 508 | TEMPORAL        | Composite |
| 509 | VENTRICLE       | Composite |
| 510 | CEREBELLUM_L    | Composite |
| 511 | DEEP_WM_GM_L    | Composite |
| 512 | FRONTAL_L       | Composite |
| 513 | LIMBIC_L        | Composite |
| 514 | OCCIPITAL_L     | Composite |
| 515 | PARIETAL_L      | Composite |
| 516 | TEMPORAL_L      | Composite |
| 517 | VENTRICLE_L     | Composite |
| 518 | CEREBELLUM_R    | Composite |
| 519 | DEEP_WM_GM_R    | Composite |
| 520 | FRONTAL_R       | Composite |
| 521 | LIMBIC_R        | Composite |
| 522 | OCCIPITAL_R     | Composite |
| 523 | PARIETAL_R      | Composite |
| 524 | TEMPORAL_R      | Composite |
| 525 | VENTRICLE_R     | Composite |
| 601 | GM              | Composite |
| 604 | WM              | Composite |
| 606 | GM_L            | Composite |

|            |            |           |
|------------|------------|-----------|
| <b>607</b> | WM_L       | Composite |
| <b>613</b> | GM_R       | Composite |
| <b>614</b> | WM_R       | Composite |
| <b>701</b> | TOTALBRAIN | Composite |
| <b>702</b> | ICV        | Composite |

**Supplementary Table 5.** Results from linear model used to examine regional volumetric differences between patients with first-episode depression (n=255) and healthy controls (n=558) with age, sex and years of education as covariates. Two-sided p values are presented along with FDR-corrected p values to account for multiple comparisons. Bold lettering indicates volume differences that are significant after FDR correction.

| ROI                              | t value | p value  | FDR-corrected p value |
|----------------------------------|---------|----------|-----------------------|
| Third Ventricle                  | -1.07   | 0.29     | 0.40                  |
| Fourth Ventricle                 | -0.36   | 0.72     | 0.82                  |
| Right Accumbens Area             | -0.75   | 0.45     | 0.57                  |
| Left Accumbens Area              | -0.99   | 0.32     | 0.43                  |
| Right Amygdala                   | -1.87   | 0.06     | 0.12                  |
| Left Amygdala                    | 0.19    | 0.85     | 0.90                  |
| Brain Stem                       | -0.53   | 0.60     | 0.71                  |
| Right Caudate                    | -0.57   | 0.57     | 0.68                  |
| Left Caudate                     | -0.80   | 0.42     | 0.53                  |
| Right Cerebellum Exterior        | -2.15   | 0.03     | 0.07                  |
| Left Cerebellum Exterior         | -2.36   | 0.02     | 0.05                  |
| Right Cerebellum White Matter    | 0.12    | 0.90     | 0.94                  |
| Left Cerebellum White Matter     | 0.05    | 0.96     | 0.97                  |
| Right Hippocampus                | -0.29   | 0.77     | 0.85                  |
| Left Hippocampus                 | -0.86   | 0.39     | 0.51                  |
| Right Inferior Lateral Ventricle | -0.08   | 0.94     | 0.96                  |
| Left Inferior Lateral Ventricle  | -0.04   | 0.97     | 0.98                  |
| Right Lateral Ventricle          | -1.29   | 0.20     | 0.28                  |
| Left Lateral Ventricle           | -0.66   | 0.51     | 0.63                  |
| Right Pallidum                   | -0.17   | 0.87     | 0.92                  |
| Left Pallidum                    | -0.01   | 0.99     | 0.99                  |
| Right Putamen                    | 0.69    | 0.49     | 0.61                  |
| Left Putamen                     | 0.29    | 0.77     | 0.85                  |
| Right Thalamus Proper            | 0.84    | 0.40     | 0.51                  |
| Left Thalamus Proper             | -0.26   | 0.79     | 0.86                  |
| Right Ventral DC                 | -2.79   | 0.01     | <b>0.02</b>           |
| Left Ventral DC                  | -2.57   | 0.01     | <b>0.03</b>           |
| Cerebellar Vermal Lobules I-V    | -3.17   | 0.002    | <b>0.01</b>           |
| Cerebellar Vermal Lobules VI-VII | 0.98    | 0.33     | 0.44                  |
| Cerebellar Vermal Lobules VIII-X | -1.69   | 0.09     | 0.15                  |
| Left Basal Forebrain             | -5.90   | 5.93E-9  | <b>2.15E-7</b>        |
| Right Basal Forebrain            | -6.22   | 8.96E-10 | <b>6.50E-8</b>        |
| Right frontal lobe WM            | -3.03   | 0.003    | <b>0.01</b>           |
| Left frontal lobe WM             | -2.59   | 0.01     | <b>0.03</b>           |



|                                                                 |       |         |                |
|-----------------------------------------------------------------|-------|---------|----------------|
| Right occipital lobe WM                                         | -4.12 | 0.00004 | <b>0.0004</b>  |
| Left occipital lobe WM                                          | -2.74 | 0.01    | <b>0.02</b>    |
| Right parietal lobe WM                                          | -3.57 | 0.0004  | <b>0.003</b>   |
| Left parietal lobe WM                                           | -3.83 | 0.0001  | <b>0.001</b>   |
| Right temporal lobe WM                                          | -2.00 | 0.05    | 0.09           |
| Left temporal lobe WM                                           | -2.22 | 0.03    | 0.06           |
| Right fornix                                                    | -0.30 | 0.76    | 0.85           |
| Left fornix                                                     | -1.70 | 0.09    | 0.15           |
| Right anterior limb of internal capsule                         | -0.39 | 0.70    | 0.80           |
| Left anterior limb of internal capsule                          | 0.89  | 0.37    | 0.49           |
| Right posterior limb of internal capsule inc. cerebral peduncle | -3.02 | 0.003   | <b>0.01</b>    |
| Left posterior limb of internal capsule inc. cerebral peduncle  | -2.66 | 0.01    | <b>0.03</b>    |
| Corpus callosum                                                 | -1.55 | 0.12    | 0.19           |
| Right anterior cingulate gyrus                                  | -4.55 | 6.38E-6 | <b>0.0001</b>  |
| Left anterior cingulate gyrus                                   | -2.88 | 0.004   | <b>0.02</b>    |
| Right anterior insula                                           | -2.35 | 0.02    | 0.05           |
| Left anterior insula                                            | -2.46 | 0.01    | <b>0.04</b>    |
| Right anterior orbital gyrus                                    | -3.19 | 0.001   | <b>0.01</b>    |
| Left anterior orbital gyrus                                     | -1.02 | 0.31    | 0.42           |
| Right angular gyrus                                             | -4.44 | 0.00001 | <b>0.0001</b>  |
| Left angular gyrus                                              | -1.84 | 0.07    | 0.12           |
| Right calcarine cortex                                          | 0.05  | 0.96    | 0.97           |
| Left calcarine cortex                                           | 2.26  | 0.02    | 0.06           |
| Right central operculum                                         | -5.81 | 9.94E-9 | <b>2.88E-7</b> |
| Left central operculum                                          | -3.27 | 0.001   | <b>0.01</b>    |
| Right cuneus                                                    | -1.19 | 0.23    | 0.33           |
| Left cuneus                                                     | -2.32 | 0.02    | 0.05           |
| Right entorhinal area                                           | -1.71 | 0.09    | 0.15           |
| Left entorhinal area                                            | -1.66 | 0.10    | 0.16           |
| Right frontal operculum                                         | -1.33 | 0.19    | 0.27           |
| Left frontal operculum                                          | -3.07 | 0.002   | <b>0.01</b>    |
| Right frontal pole                                              | -4.59 | 5.23E-6 | <b>0.0001</b>  |
| Left frontal pole                                               | -6.08 | 2.11E-9 | <b>1.02E-7</b> |
| Right fusiform gyrus                                            | -1.55 | 0.12    | 0.19           |
| Left fusiform gyrus                                             | -2.00 | 0.05    | 0.09           |
| Right gyrus rectus                                              | -4.99 | 7.74E-7 | <b>0.00002</b> |
| Left gyrus rectus                                               | -4.11 | 0.00004 | <b>0.0004</b>  |
| Right inferior occipital gyrus                                  | 1.83  | 0.07    | 0.12           |
| Left inferior occipital gyrus                                   | 2.23  | 0.03    | 0.06           |
| Right inferior temporal gyrus                                   | -4.11 | 0.00005 | <b>0.0004</b>  |

|                                                    |       |         |               |
|----------------------------------------------------|-------|---------|---------------|
| Left inferior temporal gyrus                       | -3.03 | 0.003   | <b>0.01</b>   |
| Right lingual gyrus                                | -2.41 | 0.02    | <b>0.04</b>   |
| Left lingual gyrus                                 | -3.18 | 0.002   | <b>0.01</b>   |
| Right lateral orbital gyrus                        | -0.32 | 0.75    | 0.84          |
| Left lateral orbital gyrus                         | -3.20 | 0.001   | <b>0.01</b>   |
| Right middle cingulate gyrus                       | -1.75 | 0.08    | 0.14          |
| Left middle cingulate gyrus                        | -1.63 | 0.10    | 0.17          |
| Right medial frontal cortex                        | -4.45 | 9.96E-6 | <b>0.0001</b> |
| Left medial frontal cortex                         | -2.28 | 0.02    | 0.05          |
| Right middle frontal gyrus                         | -3.13 | 0.002   | <b>0.01</b>   |
| Left middle frontal gyrus                          | -3.33 | 0.001   | <b>0.01</b>   |
| Right middle occipital gyrus                       | -2.61 | 0.01    | <b>0.03</b>   |
| Left middle occipital gyrus                        | -1.92 | 0.06    | 0.11          |
| Right medial orbital gyrus                         | -3.38 | 0.001   | <b>0.01</b>   |
| Left medial orbital gyrus                          | 0.20  | 0.84    | 0.90          |
| Right postcentral gyrus medial segment             | -1.77 | 0.08    | 0.14          |
| Left postcentral gyrus medial segment              | -4.13 | 0.00004 | <b>0.0004</b> |
| Right precentral gyrus medial segment              | -0.51 | 0.61    | 0.72          |
| Left precentral gyrus medial segment               | 1.13  | 0.26    | 0.37          |
| Right superior frontal gyrus medial segment        | -1.02 | 0.31    | 0.42          |
| Left superior frontal gyrus medial segment         | -2.66 | 0.01    | 0.03          |
| Right middle temporal gyrus                        | -2.29 | 0.02    | 0.05          |
| Left middle temporal gyrus                         | -2.28 | 0.02    | 0.05          |
| Right occipital pole                               | -2.36 | 0.02    | 0.05          |
| Left occipital pole                                | -1.42 | 0.16    | 0.24          |
| Right occipital fusiform gyrus                     | -0.65 | 0.52    | 0.63          |
| Left occipital fusiform gyrus                      | -2.04 | 0.04    | 0.08          |
| Right opercular part of the inferior frontal gyrus | -1.47 | 0.14    | 0.22          |
| Left opercular part of the inferior frontal gyrus  | -2.15 | 0.03    | 0.07          |
| Right orbital part of the inferior frontal gyrus   | -0.25 | 0.80    | 0.87          |
| Left orbital part of the inferior frontal gyrus    | 0.86  | 0.39    | 0.51          |
| Right posterior cingulate gyrus                    | -1.90 | 0.06    | 0.11          |
| Left posterior cingulate gyrus                     | -0.63 | 0.53    | 0.64          |
| Right precuneus                                    | -1.41 | 0.16    | 0.24          |
| Left precuneus                                     | -3.10 | 0.002   | <b>0.01</b>   |
| Right parahippocampal gyrus                        | -1.70 | 0.09    | 0.15          |
| Left parahippocampal gyrus                         | -1.67 | 0.10    | 0.16          |
| Right posterior insula                             | -2.50 | 0.01    | <b>0.04</b>   |
| Left posterior insula                              | -3.66 | 0.0003  | <b>0.002</b>  |
| Right parietal operculum                           | 2.34  | 0.02    | 0.05          |
| Left parietal operculum                            | -1.31 | 0.19    | 0.27          |
| Right postcentral gyrus                            | -3.31 | 0.001   | <b>0.01</b>   |

|                                                     |       |          |                 |
|-----------------------------------------------------|-------|----------|-----------------|
| Left postcentral gyrus                              | -1.94 | 0.05     | 0.10            |
| Right posterior orbital gyrus                       | -1.57 | 0.12     | 0.19            |
| Left posterior orbital gyrus                        | -3.12 | 0.002    | <b>0.01</b>     |
| Right planum polare                                 | -2.95 | 0.003    | <b>0.01</b>     |
| Left planum polare                                  | -3.43 | 0.001    | <b>0.005</b>    |
| Right precentral gyrus                              | -2.22 | 0.03     | 0.06            |
| Left precentral gyrus                               | -2.21 | 0.03     | 0.06            |
| Right planum temporale                              | 0.42  | 0.67     | 0.77            |
| Left planum temporale                               | -2.72 | 0.01     | <b>0.02</b>     |
| Right subcallosal area                              | 1.43  | 0.15     | 0.23            |
| Left subcallosal area                               | 2.39  | 0.02     | 0.05            |
| Right superior frontal gyrus                        | -2.43 | 0.02     | <b>0.04</b>     |
| Left superior frontal gyrus                         | -1.76 | 0.08     | 0.14            |
| Right supplementary motor cortex                    | -0.14 | 0.89     | 0.93            |
| Left supplementary motor cortex                     | -1.06 | 0.29     | 0.40            |
| Right supramarginal gyrus                           | -0.48 | 0.63     | 0.73            |
| Left supramarginal gyrus                            | -1.35 | 0.18     | 0.26            |
| Right superior occipital gyrus                      | 2.51  | 0.01     | <b>0.04</b>     |
| Left superior occipital gyrus                       | 1.83  | 0.07     | 0.12            |
| Right superior parietal lobule                      | -0.10 | 0.92     | 0.95            |
| Left superior parietal lobule                       | -2.26 | 0.02     | 0.06            |
| Right superior temporal gyrus                       | -2.41 | 0.02     | <b>0.04</b>     |
| Left superior temporal gyrus                        | -2.49 | 0.01     | <b>0.04</b>     |
| Right temporal pole                                 | -6.57 | 1.01E-10 | <b>1.47E-8</b>  |
| Left temporal pole                                  | -5.44 | 7.64E-8  | <b>0.000002</b> |
| Right triangular part of the inferior frontal gyrus | -2.59 | 0.01     | <b>0.03</b>     |
| Left triangular part of the inferior frontal gyrus  | -3.18 | 0.002    | <b>0.01</b>     |
| Right transverse temporal gyrus                     | -0.82 | 0.41     | 0.53            |
| Left transverse temporal gyrus                      | -0.49 | 0.62     | 0.73            |

## Supplementary References

- Arnone, D., McKie, S., Elliott, R., Juhasz, G., Thomas, E. J., Downey, D., . . . Anderson, I. M. (2013). State-dependent changes in hippocampal grey matter in depression. *Mol Psychiatry*, *18*(12), 1265-1272. doi:10.1038/mp.2012.150
- Arnone, D., McKie, S., Elliott, R., Thomas, E. J., Downey, D., Juhasz, G., . . . Anderson, I. M. (2012). Increased amygdala responses to sad but not fearful faces in major depression: relation to mood state and pharmacological treatment. *Am J Psychiatry*, *169*(8), 841-850. doi:10.1176/appi.ajp.2012.11121774
- Dunlop, B. W., Binder, E. B., Cubells, J. F., Goodman, M. M., Kelley, M. E., Kinkead, B., . . . Mayberg, H. S. (2012). Predictors of remission in depression to individual and combined treatments (PRedICT): study protocol for a randomized controlled trial. *Trials*, *13*, 106. doi:10.1186/1745-6215-13-106
- Dutta, A., McKie, S., Downey, D., Thomas, E., Juhasz, G., Arnone, D., . . . Anderson, I. M. (2019). Regional default mode network connectivity in major depressive disorder: modulation by acute intravenous citalopram. *Transl Psychiatry*, *9*(1), 116. doi:10.1038/s41398-019-0447-0
- Ford, B. N., Yolken, R. H., Aupperle, R. L., Teague, T. K., Irwin, M. R., Paulus, M. P., & Savitz, J. (2019). Association of Early-Life Stress With Cytomegalovirus Infection in Adults With Major Depressive Disorder. *JAMA Psychiatry*, *76*(5), 545-547. doi:10.1001/jamapsychiatry.2018.4543
- Godlewska, B. R., Browning, M., Norbury, R., Igoumenou, A., Cowen, P. J., & Harmer, C. J. (2018). Predicting Treatment Response in Depression: The Role of Anterior Cingulate Cortex. *International Journal of Neuropsychopharmacology*, *21*(11), 988-996. doi:10.1093/ijnp/pyy069
- Godlewska, B. R., Hasselmann, H. W., Igoumenou, A., Norbury, R., & Cowen, P. J. (2014). Short-term escitalopram treatment and hippocampal volume. *Psychopharmacology (Berl)*, *231*(23), 4579-4581. doi:10.1007/s00213-014-3771-3
- Green, S., Lambon Ralph, M. A., Moll, J., Deakin, J. F., & Zahn, R. (2012). Guilt-selective functional disconnection of anterior temporal and subgenual cortices in major depressive disorder. *Arch Gen Psychiatry*, *69*(10), 1014-1021. doi:10.1001/archgenpsychiatry.2012.135
- Habota, T., Sandu, A. L., Waiter, G. D., McNeil, C. J., Steele, J. D., Macfarlane, J. A., . . . McIntosh, A. M. (2019). Cohort profile for the STRatifying Resilience and Depression Longitudinally (STRADL) study: A depression-focused investigation of Generation Scotland, using detailed clinical, cognitive, and neuroimaging assessments. *Wellcome Open Res*, *4*, 185. doi:10.12688/wellcomeopenres.15538.2
- Hamilton, M. (1960). A rating scale for depression. *J Neurol Neurosurg Psychiatry*, *23*(1), 56-62. doi:10.1136/jnnp.23.1.56
- Leucht, S., Fennema, H., Engel, R. R., Kaspers-Janssen, M., & Szegedi, A. (2018). Translating the HAM-D into the MADRS and vice versa with equipercetile linking. *J Affect Disord*, *226*, 326-331. doi:10.1016/j.jad.2017.09.042
- MacQueen, G. M., Hassel, S., Arnott, S. R., Jean, A., Bowie, C. R., Bray, S. L., . . . Kennedy, S. H. (2019). The Canadian Biomarker Integration Network in Depression (CAN-BIND): magnetic resonance imaging protocols. *J Psychiatry Neurosci*, *44*(4), 223-236. doi:10.1503/jpn.180036
- Misaki, M., Suzuki, H., Savitz, J., Drevets, W. C., & Bodurka, J. (2016). Individual Variations in Nucleus Accumbens Responses Associated with Major Depressive Disorder Symptoms. *Sci Rep*, *6*, 21227. doi:10.1038/srep21227
- Montgomery, S. A., & Asberg, M. (1979). A new depression scale designed to be sensitive to change. *Br J Psychiatry*, *134*, 382-389. doi:10.1192/bjp.134.4.382
- Nouretdinov, I., Costafreda, S. G., Gammernan, A., Chervonenkis, A., Vovk, V., Vapnik, V., & Fu, C. H. (2011). Machine learning classification with confidence: application of transductive conformal predictors to MRI-based diagnostic and prognostic markers in depression. *Neuroimage*, *56*(2), 809-813. doi:10.1016/j.neuroimage.2010.05.023

- Qiu, L., Xia, M., Cheng, B., Yuan, L., Kuang, W., Bi, F., . . . Gong, Q. (2018). Abnormal dynamic functional connectivity of amygdalar subregions in untreated patients with first-episode major depressive disorder. *J Psychiatry Neurosci*, *43*(4), 262-272. doi:10.1503/jpn.170112
- Rush, A. J., Trivedi, M. H., Ibrahim, H. M., Carmody, T. J., Arnow, B., Klein, D. N., . . . Keller, M. B. (2003). The 16-Item Quick Inventory of Depressive Symptomatology (QIDS), clinician rating (QIDS-C), and self-report (QIDS-SR): a psychometric evaluation in patients with chronic major depression. *Biol Psychiatry*, *54*(5), 573-583. doi:10.1016/s0006-3223(02)01866-8
- Sacchet, M. D., & Gotlib, I. H. (2017). Myelination of the brain in Major Depressive Disorder: An in vivo quantitative magnetic resonance imaging study. *Sci Rep*, *7*(1), 2200. doi:10.1038/s41598-017-02062-y
- Sacchet, M. D., Livermore, E. E., Iglesias, J. E., Glover, G. H., & Gotlib, I. H. (2015). Subcortical volumes differentiate Major Depressive Disorder, Bipolar Disorder, and remitted Major Depressive Disorder. *Journal of Psychiatric Research*, *68*, 91-98. doi:https://doi.org/10.1016/j.jpsychires.2015.06.002
- Sankar, A., Zhang, T., Gaonkar, B., Doshi, J., Erus, G., Costafreda, S. G., . . . Fu, C. H. (2016). Diagnostic potential of structural neuroimaging for depression from a multi-ethnic community sample. *BJPsych Open*, *2*(4), 247-254. doi:10.1192/bjpo.bp.115.002493
- Schwartz, J., Ordaz, S. J., Kircanski, K., Ho, T. C., Davis, E. G., Camacho, M. C., & Gotlib, I. H. (2019). Resting-state functional connectivity and inflexibility of daily emotions in major depression. *J Affect Disord*, *249*, 26-34. doi:10.1016/j.jad.2019.01.040
- Trivedi, M. H., McGrath, P. J., Fava, M., Parsey, R. V., Kurian, B. T., Phillips, M. L., . . . Weissman, M. M. (2016). Establishing moderators and biosignatures of antidepressant response in clinical care (EMBARC): Rationale and design. *Journal of Psychiatric Research*, *78*, 11-23. doi:https://doi.org/10.1016/j.jpsychires.2016.03.001
- Trivedi, M. H., Rush, A. J., Ibrahim, H. M., Carmody, T. J., Biggs, M. M., Suppes, T., . . . Kashner, T. M. (2004). The Inventory of Depressive Symptomatology, Clinician Rating (IDS-C) and Self-Report (IDS-SR), and the Quick Inventory of Depressive Symptomatology, Clinician Rating (QIDS-C) and Self-Report (QIDS-SR) in public sector patients with mood disorders: a psychometric evaluation. *Psychol Med*, *34*(1), 73-82. doi:10.1017/s0033291703001107
- Uher, R., Farmer, A., Maier, W., Rietschel, M., Hauser, J., Marusic, A., . . . Aitchison, K. J. (2008). Measuring depression: comparison and integration of three scales in the GENDEP study. *Psychol Med*, *38*(2), 289-300. doi:10.1017/s0033291707001730
- Wise, T., Marwood, L., Perkins, A. M., Herane-Vives, A., Joules, R., Lythgoe, D. J., . . . Arnone, D. (2017). Instability of default mode network connectivity in major depression: a two-sample confirmation study. *Transl Psychiatry*, *7*(4), e1105. doi:10.1038/tp.2017.40
- Wise, T., Marwood, L., Perkins, A. M., Herane-Vives, A., Williams, S. C. R., Young, A. H., . . . Arnone, D. (2018). A morphometric signature of depressive symptoms in unmedicated patients with mood disorders. *Acta Psychiatr Scand*, *138*(1), 73-82. doi:10.1111/acps.12887
- Zhao, Y., Niu, R., Lei, D., Shah, C., Xiao, Y., Zhang, W., . . . Gong, Q. (2020). Aberrant Gray Matter Networks in Non-comorbid Medication-Naive Patients With Major Depressive Disorder and Those With Social Anxiety Disorder. *Front Hum Neurosci*, *14*, 172. doi:10.3389/fnhum.2020.00172
- Zhao, Y., Zhang, F., Zhang, W., Chen, L., Chen, Z., Lui, S., & Gong, Q. (2021). Decoupling of Gray and White Matter Functional Networks in Medication-Naïve Patients With Major Depressive Disorder. *J Magn Reson Imaging*, *53*(3), 742-752. doi:10.1002/jmri.27392
- Zheng, H., Ford, B. N., Bergamino, M., Kuplicki, R., Hunt, P. W., Bodurka, J., . . . Savitz, J. (2021). A hidden menace? Cytomegalovirus infection is associated with reduced cortical gray matter volume in major depressive disorder. *Mol Psychiatry*, *26*(8), 4234-4244. doi:10.1038/s41380-020-00932-y
